# Supplementary material for: Low-density nanoporous phases of group-III nitrides built from sodalite cage clusters
Source: Royal Society of Chemistry journal article supplement (doi:10.1039/c3cp50814e), 2013-01-01
Supplement: c3cp50814e.pdf [file c3cp50814e.pdf]

## Electronic Supporting Information

### Low-density nanoporous phases of group-III nitrides built from sodalite cage clusters

Zhifeng Liu<sup>a</sup>, Xinqiang Wang<sup>\*a</sup>, Gaobin Liu<sup>a</sup>, Ping Zhou<sup>a,b</sup>, Jian Sui<sup>a</sup>, Xuefang Wang<sup>a</sup>,

Hengjiang Zhu<sup>c</sup> and Zhilin Hou<sup>d</sup>

<sup>a</sup> College of Physics, Chongqing University, Chongqing, P.R. China.

<sup>b</sup> School of Science, Chongqing Jiaotong University, Chongqing, P.R. China.

<sup>c</sup> College of Physics and Electronic Engineering, Xinjiang Normal University, Urumchi, P.R. China.

<sup>d</sup> Southwest China Institute of Electronic Technology, Chengdu, P.R. China.

\*Corresponding Author: Fax: +86-023-65678365; Tel: +86-023-65678365; E-mail: xqwang@cqu.edu.cn

#### S1. Natural tilings of the new nanoporous phases of MN

SOD-MN  $Pm\bar{3}n$

Face symbol:  $[4^6.6^8]$

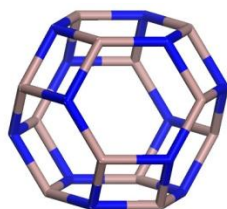

V, E, F: (24, 36, 14)

Symmetry:  $m\bar{3}$

**LTA-MN**  $Fm\bar{3}c$

**Face symbol:**  $[4^6]$

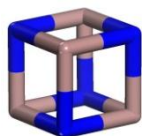

**V, E, F:** (8, 12, 6)  
**Symmetry:**  $\bar{4}3m$

$[4^6.6^8]$

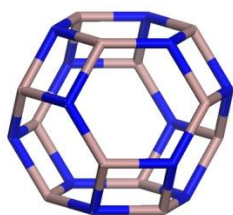

(24, 36, 14)  
 $m\bar{3}$

$[4^{12}.6^8.8^6]$

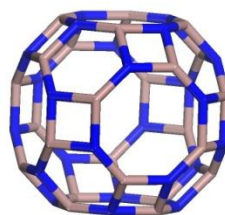

(48, 72, 26)  
 432

**FAU-MN**  $Fd\bar{3}$

**Face symbol:**  $[4^6.6^2]$

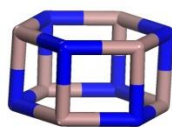

**V, E, F:** (12, 18, 8)  
**Symmetry:**  $\bar{3}m$

$[4^6.6^8]$

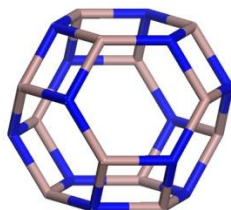

(24, 36, 14)  
 $m\bar{3}$

$[4^{18}.6^4.12^4]$

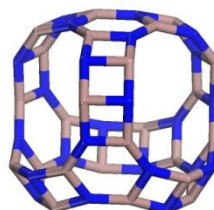

(48, 72, 26)  
 23

**EMT-MN**  $P\bar{3}1c$

**Face symbol:**  $[4^6.6^2]$

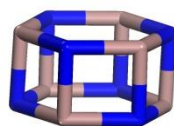

**V, E, F:** (12, 18, 8)  
**Symmetry:**  $\bar{3}m$

$[4^6.6^8]$

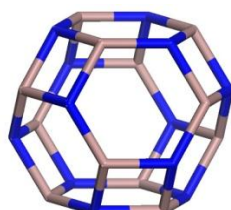

(24, 36, 14)  
 $m\bar{3}$

$[4^{15}.6^2.12^3]$

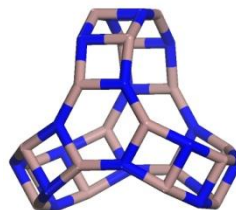

(36, 54, 20)  
 32

$[4^{21}.6^6.12^5]$

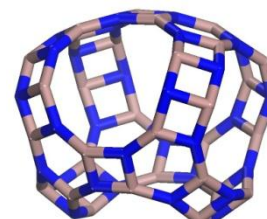

(60, 90, 32)  
 32

**Tri-MN**  $R\bar{3}$

**Face symbol:**  $[4^6.6^2]$

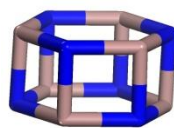

**V, E, F:** (12, 18, 8)  
**Symmetry:**  $\bar{3}m$

$[4^6.6^8]$

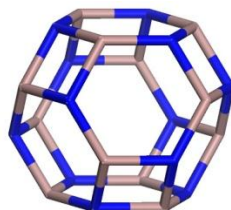

(24, 36, 14)  
 $m\bar{3}$

**Ort-MN** *Pban*

Face symbol:  $[4^6]$

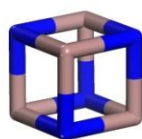

**V, E, F:** (8, 12, 6)

**Symmetry:**  $\bar{4}3m$

$[4^6.6^2]$

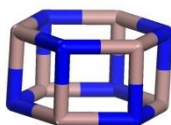

(12, 18, 8)

$\bar{3}m$

$[4^6.6^8]$

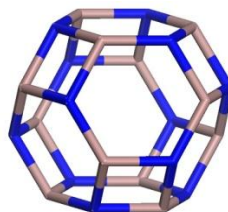

(24, 36, 14)

$m\bar{3}$

$[4^{18}.6^4.8^4.12^2.16^2]$

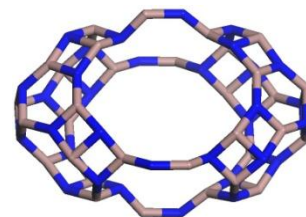

(64, 92, 30)

**Tet-MN** *P4<sub>2</sub>/mcm*

Face symbol:  $[4^6]$

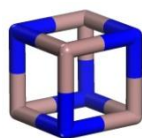

**V, E, F:** (8, 12, 6)

**Symmetry:**  $\bar{4}3m$

$[4^6.6^8]$

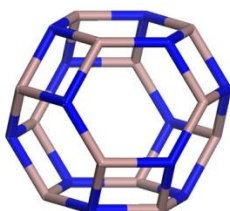

(24, 36, 14)

$m\bar{3}$

$[4^4.6^4.12^2]$

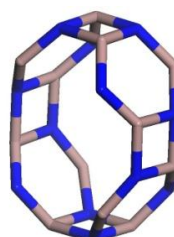

(24, 32, 10)

$222$

$[12^6]$

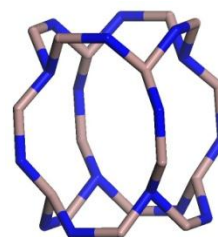

(32, 36, 6)

$\bar{4}2m$

**Mon-MN** *C2/m*

Face symbol:  $[4^6.6^2]$

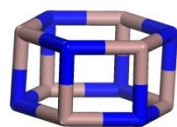

**V, E, F:** (12, 18, 8)

**Symmetry:**  $\bar{3}m$

$[4^6.6^8]$

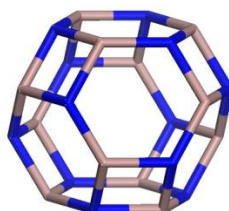

(24, 36, 14)

$m\bar{3}$

$[4^{14}.6^6.8^4]$

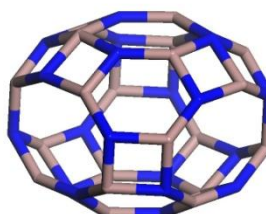

(40, 62, 24)

$2/m$

**S2. Estimations of pore volume and specific surface area for the new nanoporous phases**

From the natural tilings, one can find that the structure type is “Cage” for all of the eight new nanoporous phases. We believe, therefore, that the volume of a sphere may effectively describe the hollow space of the cage. To choose a rational radius for the sphere of the cage, we use Helium molecules  $\text{He}_n$  (2-10) to fill the hollow space of  $\text{M}_{12}\text{N}_{12}$ . After full optimization without any symmetry constraint, we find that the sodalite cage can be well retained when  $n \leq 8$  and  $n \leq 6$  for  $\text{Ga}_{12}\text{N}_{12}$   $\text{Al}_{12}\text{N}_{12}$ , respectively. Based on these calculations, the effective radius ( $R$ ) of the sphere can



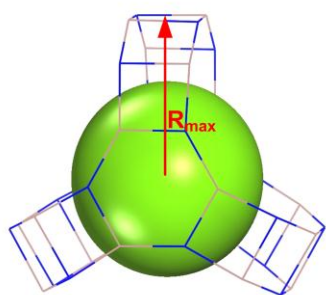

Cage  $[4^{15}.6^2.12^3]$

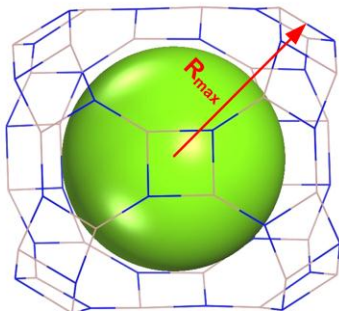

Cage  $[4^{21}.6^6.12^5]$

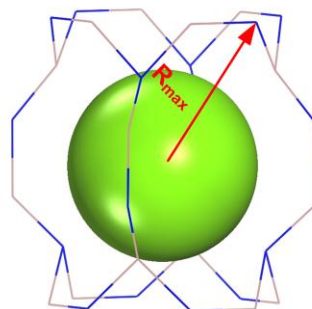

Cage  $[12^6]$

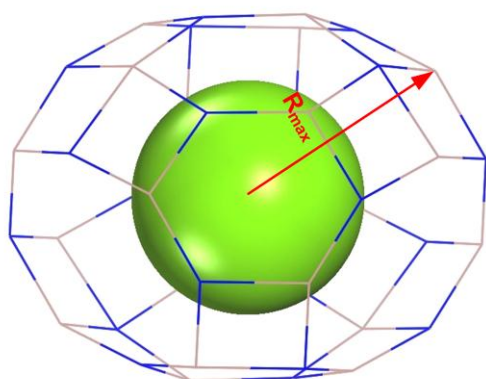

Cage  $[4^{14}.6^6.8^4]$

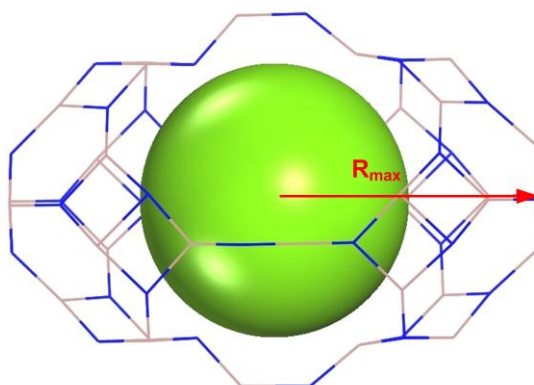

Cage  $[4^{18}.6^4.8^4.12^2.16^2]$
